# Supplementary material
Source: MDPI journal article supplement (https://www.mdpi.com/2409-515X/8/2/26)
Supplement: s1 [file s1]

**Table S1:** Results of questionnaire based survey on awareness among parents and Anganwadi workers on NBS and IEM

|                     | Questionnaire                                                                                                                                                                  | Post intervention Response |    |                     |     |
|---------------------|--------------------------------------------------------------------------------------------------------------------------------------------------------------------------------|----------------------------|----|---------------------|-----|
|                     |                                                                                                                                                                                | Parents <sup>1(n)</sup>    |    | AWW <sup>2(n)</sup> |     |
|                     |                                                                                                                                                                                | Yes (%)                    | No | Yes (%)             | No  |
| Awareness questions | NBS helps to diagnose IEM before symptoms appear.                                                                                                                              | 154(96.3)                  | 6  | 385(94.8)           | 21  |
|                     | IEM disorders are inherited and parent from birth.                                                                                                                             | 140(87.5)                  | 20 | 345(85)             | 61  |
|                     | IEM is not infectious.                                                                                                                                                         | 154(96.3)                  | 6  | 303(74.6)           | 103 |
|                     | Do you know that IEM are rare diseases?                                                                                                                                        | 142(88.8)                  | 18 | 364(89.7)           | 42  |
|                     | NBS should be done after 48 h and before 72 h of birth and before discharge of newborn baby from hospital.                                                                     | 122(76.3)                  | 38 | 373(91.9)           | 33  |
|                     | IEM should be diagnosed as early as possible to prevent death or disability.                                                                                                   | 76(47.5)                   | 84 | 394(97.0)           | 12  |
|                     | Infants with IEM (treatable) can lead a normal life if diagnosed and treated at early neonatal period.                                                                         | 107(66.9)                  | 53 | 391(96.3)           | 15  |
|                     | Do you agree that babies with IEM look healthy like other newborns when they are born?                                                                                         | 110(68.8)                  | 50 | 283(69.7)           | 123 |
|                     | Do you know that NBS is done by collecting only 2-3 drops of blood from baby's heel?                                                                                           | 157(98.1)                  | 3  | 349(86)             | 57  |
|                     | Do you know that there are no risks involved in performing NBS?                                                                                                                | 131(81.9)                  | 29 | 378(93.1)           | 28  |
| Attitude questions  | Do you agree that newborn screening should be made a routine program like immunization program?                                                                                | 160(100)                   | 0  | 366(90.1)           | 40  |
|                     | Would you like to receive information on NBS prior to your babies birth?                                                                                                       | 152(95.0)                  | 8  | NA                  | NA  |
|                     | Are you willing to be a part of NBS Program in the sample collection and in counselling parents?                                                                               | NA                         | NA | 367(90.4)           | 39  |
|                     | Would you recommend NBS for any of your family members or neighbors who are expecting a baby?                                                                                  | 159(99.4)                  | 1  | 395(97.3)           | 11  |
|                     | Would you like to receive training regarding NBS?                                                                                                                              | NA                         | NA | 384(94.6)           | 22  |
|                     | Do you think that the public awareness programs regarding screening test conducted by Government, health workers or other media is helpful in creating awareness among people? | 142(88.8)                  | 18 | 384(94.6)           | 22  |
